# Supplementary material for: RGS19 activates the MYH9/β-catenin/c-Myc positive feedback loop in hepatocellular carcinoma
Source: Springer Nature journal article supplement (doi:10.1038/s12276-024-01244-9), 2024-06-03
Supplement: MOESM1 [file 12276_2024_1244_MOESM1_ESM.pdf]

# **Supplementary Material**

## **Materials and Methods**

### **RNA isolation and quantitative real-time PCR**

Total RNA from tissues and cells was extracted using an RNA Miniprep Kit (Axygen, China) and quantified with a Nanodrop ND-2000 (Thermo, USA). The cDNA was synthesized with a Reverse Transcription Kit (Applied Biosystems). Real-time PCR was performed using SYBR Green (Roche, USA) on an ABIPRISM 7500HT instrument (Applied Biosystems). The expression of mRNA was normalized to that of GAPDH. The primer sequences are shown in Supplementary Table 2

### **Wound-healing assay**

A total of  $30 \times 10^4$  transfected cells were seeded into six-well plates and cultured until cells were confluent. The bottom of each well was straightly scratched with a 10  $\mu$ L pipette tip, each well was washed with PBS, and the cells were cultured with serum-free medium for 24 h. The wound-healing results were observed at 0 and 24 h with a microscopy and camera.

### **Migration and invasion assay**

For transwell-migration assays, transfected cells in serum-free medium were plated in the upper chamber of the Transwell system. Normal medium was added into the 24-well plate. During the invasion assays, Matrigel-coated (BD Biosciences, San Jose, CA, USA) transwell chambers were used to examine the invasion ability of cells. The following procedures were similar to those used for the migration assays. After a 24-48

h incubation time, the cells on the bottom surface of the filter membranes were fixed, stained and counted under a light microscope.

### **Cell proliferation and colony formation assay**

For cell counting kit-8 (CCK-8) assays, transfected cell suspensions were seeded in 96-well plates ( $1 \times 10^3$  cells/well). CCK-8 solution (Dojindo, Japan) was added to each well at the indicated time points. After incubation for two hours at 37 °C, the absorbance at 450 nm was measured. For colony formation assays,  $1 \times 10^3$  transfected cells were plated into 6-well plates. After incubating for 2 weeks, the culture medium was removed and the colonies were fixed with 4% paraformaldehyde (PFA) and stained with 0.5% crystal violet.

### **EdU assay**

An EdU analysis kit (Beyotime, China) was used to perform EdU dye assays for cells according to the manufacturer's instructions. Then a fluorescence microscope (Nikon, Japan) was used to detect labelled cells, and the results were evaluated by Image-Pro Plus 6.0 software (Media Cybernetics, Inc., MD, USA). The results were calculated by the following process: percentage of proliferative cells (%) = the number of labelled cells/ the total cell number.

### **Terminal dUTP nick-end labeling (TUNEL) assay**

We performed a TUNEL assay (Roche, Shanghai, China) according to the manufacturer's instructions to detect apoptosis levels in vivo and quantified TUNEL-positive cells under microscopy.

### **Flow cytometric analysis**

For apoptosis analysis, we used the Annexin V-FITC Apoptosis Detection Kit (Beyotime, China). Briefly, the indicated cells were suspended in 195 $\mu$ l of binding buffer, and 5 $\mu$ l Annexin V-FITC and 10 $\mu$ l of PI were then added. The cells were incubated on the ice in the dark. The flow cytometric analysis was used to detect apoptotic cells.

### **Lentiviral construction and cell transfection**

To generate stable RGS19-overexpressing and RGS19-knockdown cell lines, lentiviral vectors for human RGS19 regulation (Lv-RGS19, Lv-shRGS19) and the corresponding control vectors (Lv-NC) were obtained from HanBio (Shanghai, China). We also used Lipo2000 to transfect siRNA or plasmids targeting MYH9,  $\beta$ -catenin and c-Myc into HCC cell lines.

### **Immunohistochemical (IHC) staining**

The IHC staining procedures were similar to what we previously reported<sup>1</sup>. The tissue sections were incubated with primary antibodies overnight. The next day, the sections were incubated with secondary antibodies (Vector Laboratories, Burlingame, CA, USA). Finally, tissue sections were stained with a diaminobenzidine (DAB) kit (Vector Laboratories) and counterstained with haematoxylin (Sigma-Aldrich, USA). The primary antibodies for IHC included RGS19, MYH9,  $\beta$ -catenin, Ki-67 and c-Myc. The results were based on the intensity and proportion of staining. The staining intensity was scored as 0 (negative), 1 (weak), 2 (moderate), and 3 (strong). The positively stained cell proportion was defined as follows: 0 (negative), 1 (0.01-25%), 2 (25.01-50%), 3 (50.01-75%) and 4 (75.01-100%). The histologic score (H score) was

calculated by multiplying the intensity score and proportion score. Tissue sections with an H score  $\leq 4$  were classified into the low expression group, and those with an H score  $>4$  were classified into the high expression group.

### **Western blot**

Tissues and cells were lysed with RIPA buffer containing protease and phosphatase inhibitors. The protein samples were separated on SDS-PAGE gels and transferred onto nitrocellulose membranes. Then, the membranes were incubated with primary antibodies overnight at 4 °C, probed with IRDye 800CW secondary antibodies (LI-COR, USA) and visualized by the Odyssey® Imaging System (LI-COR, USA). Information of the primary antibodies is supplied in Supplementary Table 3.

### **Co-immunoprecipitation and Mass spectrum (MS)**

Cells were lysed in IP lysis buffer (Beyotime, China), incubated for 30 minutes on ice and centrifuged at 12000×g for 15 minutes. Cell lysates were immunoprecipitated with antibodies against Flag and MYH9 or negative control IgG on a rotator at 4 °C overnight. The next day, the A/G plus agarose beads (Santa Cruze, USA) were added into precipitate the protein complex at 4 °C for 4h. Subsequently, samples were washed five times with IP buffer, and the beads were boiled in loading buffer. The protein was prepared for western blot or LC-MS/MS from Aksomics (Shanghai, China). The results of LC-MS/MS were shown in Supplementary Table 4.

### **CHX assay**

The indicated cells were treated with CHX (20μM). These cells were collected at indicated time point and prepared for western blot analysis. Cells were transfected with

scramble control, siRNA or plasmid, and cultured with MG132 (10 $\mu$ M) or CQ (10 $\mu$ M) for 6h. Then the cells were collected and prepared for western blot analysis.

### **In vitro ubiquitination assay**

Cells were transfected with plasmids and siRNAs as indicated, with HA-Ub. After 48h of transfection, the cells were treated with MG132 (100nM) for 24h. The cell lysates prepared with IP lysis buffer (Beyotime, China) were used to immunoprecipitation for MYH9 proteins. The level of MYH9 ubiquitination were detected by anti-Ub or anti-HA antibody.

### **Immunofluorescent (IF) staining**

The detailed procedures of IF have been previously described<sup>2</sup>. Briefly, cells were seeded in confocal dishes. After adherence to the dish, the cells were fixed with 4% paraformaldehyde and permeabilized with Triton X-100. Then, the cells were incubated with specific antibodies and counterstained with 4,6-diamidino-2-phenylindole (Vector, Laboratories). Confocal microscopy (Zeiss LSM 880) was used to take images.

### **Plasmid construction**

RGS19<sup>Flag</sup>, Ub<sup>HA</sup> and c-Myc<sup>Flag</sup> plasmids constructed with the pcDNA3.1(+) vector and MYH9<sup>His</sup> plasmid constructed with the CMV-M14 vector were obtained from GeneChem (Shanghai, China). P1, P2, P3 truncations of RGS19, SH3-like, Motor, Tail truncations of MYH9 and the full length of STUB1 with its truncations were synthesized by Sangon (Shanghai, China).

### **Glutathione S-transferase (GST)-pulldown assay**

Bacteria-expressed GST or GST-RGS19 and GST-MYH9<sup>Motro</sup> proteins were purified via GST-tag purification kit (Beyotime, China) following the manufacturer's protocols. His or His-tagged STUB1 and RGS19 were harvested via His-tag purification kit (Beyotime, China). The GST-RGS19 fusion protein was added to cell lysates of HEK-293T cells transfected with MYH9<sup>His</sup> at 4 °C for 4h. Bound proteins were then analyzed via western blotting.

### **TOP/ FOP flash reporter assay**

The TOP/ FOP-flash reporter and pTK-RL plasmids were co-transfected into cells. After 48h transfection, the Dual-Luciferase Assay Kit (Promega) was utilized according to the instructions. We detected the activities of the both firefly and Renilla luciferase reporters. The TOP-Flash and FOP-Flash reporter activity levels were calculated as the relative ratio of firefly luciferase activity to Renilla luciferase activity.

### **Luciferase assay**

To investigate the regulatory effect of c-Myc on the transcriptional expression of RGS19, the full-length promoter region of RGS19 or mutated c-Myc binding sites of the RGS19 promoter were cloned into the luciferase reporter vector. Then, the WT-RGS19 promoter or MUT-RGS19 promoter reporter plasmids were co-transfected with con or c-Myc plasmids into HEK-293T cells. After transfection for 48h, the cells were harvested, and The Dual-Luciferase Reporter Assay system (Promega) was used to detect luciferase activity.

### **Chromatin immunoprecipitation assay (ChIP)**

A ChIP assay kit was purchased from Millipore. Briefly, HCC cells were crosslinked with 1% formaldehyde, and the cell lysates were sonicated into 500bp fragments. The soluble material was then purified by centrifugation and mixed with a rabbit anti-c-Myc antibody or control rabbit IgG for immunoprecipitation. After that, the magnetic protein A/G beads were added, and the lysis were reverse rotation at 4°C for 24h. The recovered DNA fragments were used to detect the c-Myc binding sites by qPCR. The primers used for ChIP are listed in Supplementary Table 3.

### **Transcriptomics data analysis**

Based on data from TCGA, mRNA expression profiles of HCC patients were applied in correlation analysis, differential expression analysis, survival analysis and Gene Set Enrichment Analysis (GSEA).

### **Hydrodynamic tail vein injection**

Detailed methods have previously described<sup>3,4</sup>. Plasmid dissolved in 2 ml saline was injected into 6-week-old male C57BL/6 mice via the tail vein within 5-7 seconds. We prepared 13 µg of c-Myc, 10 µg of sgP53, 8.25 µg of Sleeping Beauty (SB) transposase and 10 µg of sgRGS19 or empty vector. Vectors for this experiment were prepared using the EndoFreeMaxi kit (Qiagen). The survival of mice and HCC incidence were analyzed.

### ***In Vivo* Efficacy Studies**

Four- to six- week-old male BALB/C nude mice were purchased from Vital River Laboratory (Beijing, China) and were housed under specific pathogen-free conditions. We performed animal experiments that were approved by the Animal Ethics Committee.

For the subcutaneous xenograft model,  $3 \times 10^6$  transfected cells suspended in 150  $\mu$ L PBS were injected into the flanks of the mice. Tumor size was measured weekly. After six weeks, the tumor was removed and its weight and volume were recorded. To establish the liver orthotopic xenograft implantation model, subcutaneous tumours were divided into 1 mm<sup>3</sup> sections and were implanted into the liver. The growth of tumours was measured by bioluminescent signals once a week and six weeks later the mice were sacrificed. The pulmonary metastatic model was established by injecting  $2 \times 10^6$  transfected cells into the tail vein of the mouse. The monitoring of metastatic nodules was achieved by bioluminescent signals. The mouse was sacrificed six weeks later.

## Reference

- 1 Wang, C. *et al.* LncRNA Hnf4a<sup>os</sup> exacerbates liver ischemia/reperfusion injury in mice via Hnf4a<sup>os</sup>/Hnf4 $\alpha$  duplex-mediated PGC1 $\alpha$  suppression. *Redox biology* **57**, 102498, doi:10.1016/j.redox.2022.102498 (2022).
- 2 Lu, S. *et al.* NNMT promotes the progression of intrahepatic cholangiocarcinoma by regulating aerobic glycolysis via the EGFR-STAT3 axis. *Oncogenesis* **11**, 39, doi:10.1038/s41389-022-00415-5 (2022).
- 3 Ruiz de Galarreta, M. *et al.*  $\beta$ -Catenin Activation Promotes Immune Escape and Resistance to Anti-PD-1 Therapy in Hepatocellular Carcinoma. *Cancer Discov* **9**, 1124-1141, doi:10.1158/2159-8290.Cd-19-0074 (2019).
- 4 Xue, W. *et al.* CRISPR-mediated direct mutation of cancer genes in the mouse liver. *Nature* **514**, 380-384, doi:10.1038/nature13589 (2014).



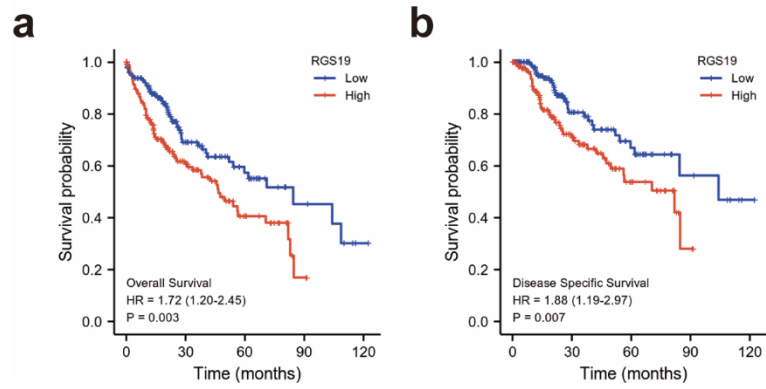

**Supplementary Fig. 1.**

(a) Patients from the TCGA database with high expression level of RGS19 had poorer overall survival and (b) shorter disease-specific survival than patients with low expression.

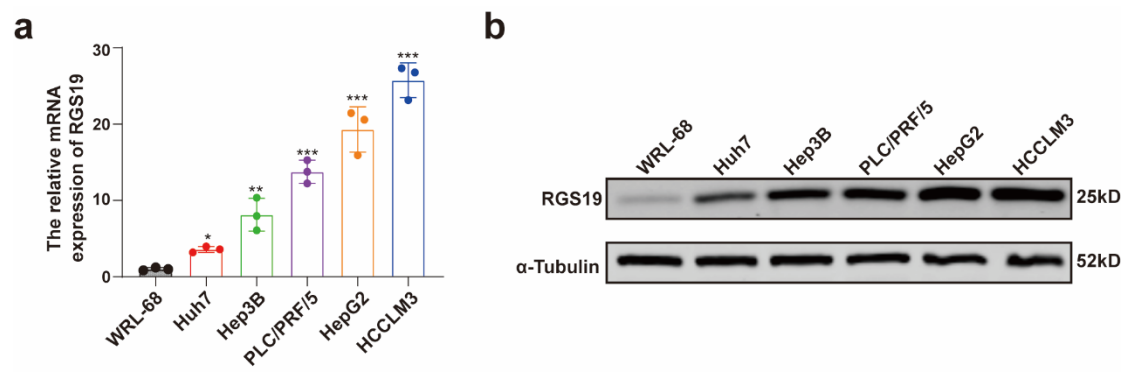

**Supplementary Fig. 2.**

(a) The expression of RGS19 in HCC cell lines was measured by qRT-PCR and (b) Western blot.

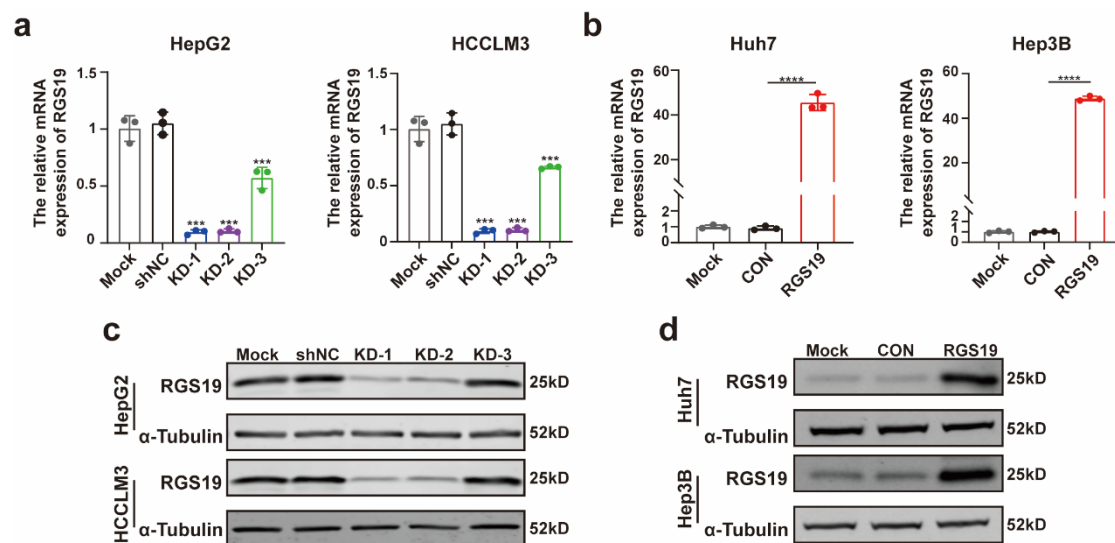

**Supplementary Fig. 3.**

(a, b) The mRNA expression of RGS19 was detected by q-PCR in HCC cells after lentiviral transfection. (c, d) Western blot analysis of the expression of RGS19 in HCC cells after lentiviral transfection.

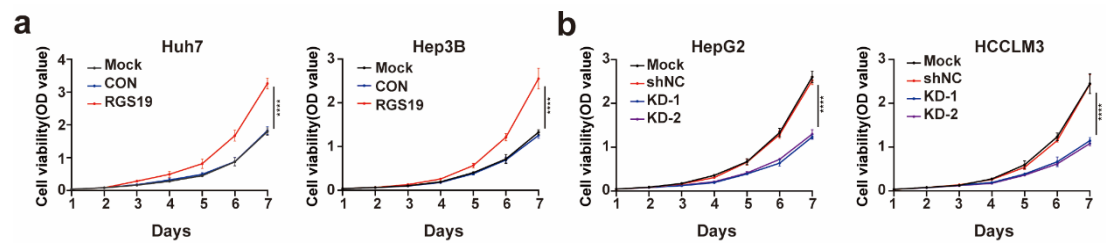

**Supplementary Fig. 4.**

(a, b) The influence of RGS19 overexpression and knockdown on HCC cells proliferation was evaluated by CCK-8 assays.

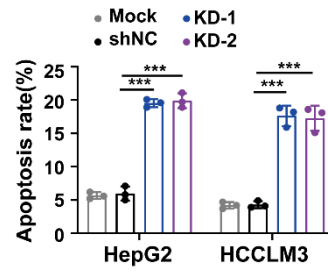

**Supplementary Fig. 5.**

Analysis of the apoptosis rate mediated by RGS19-knockdown in HCC cells.

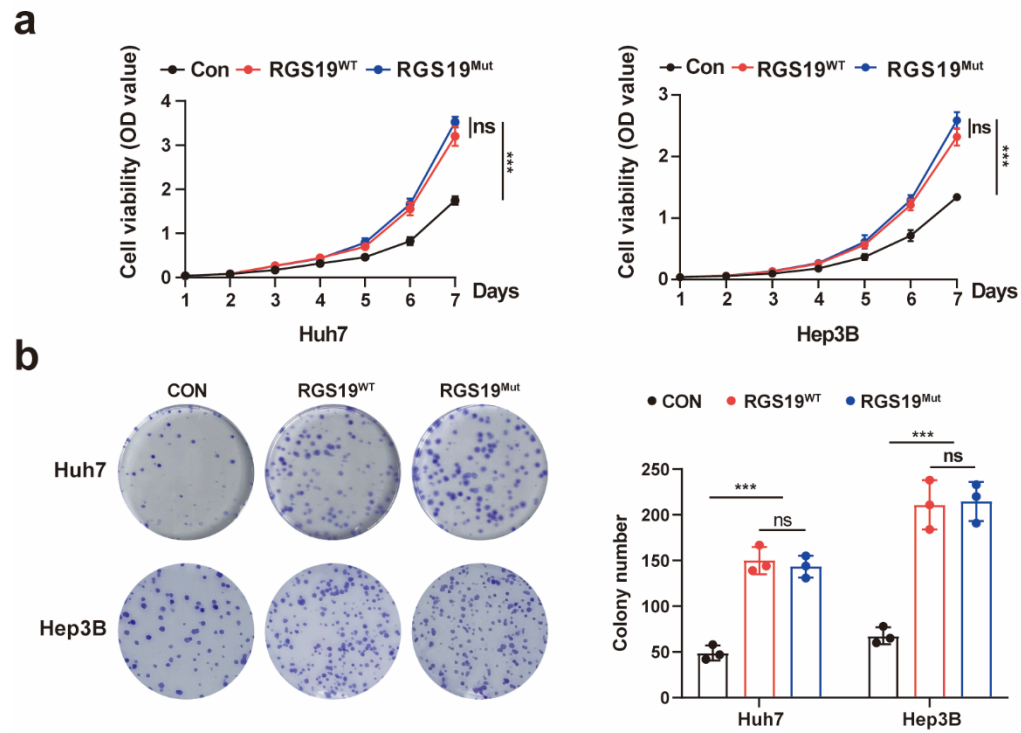

**Supplementary Fig. 6.**

(a, b) Analysis of CCK-8 assays and colony formation assays in HCC cells transfected with CON, RGS19<sup>WT</sup> or RGS19<sup>Mut</sup> plasmids.

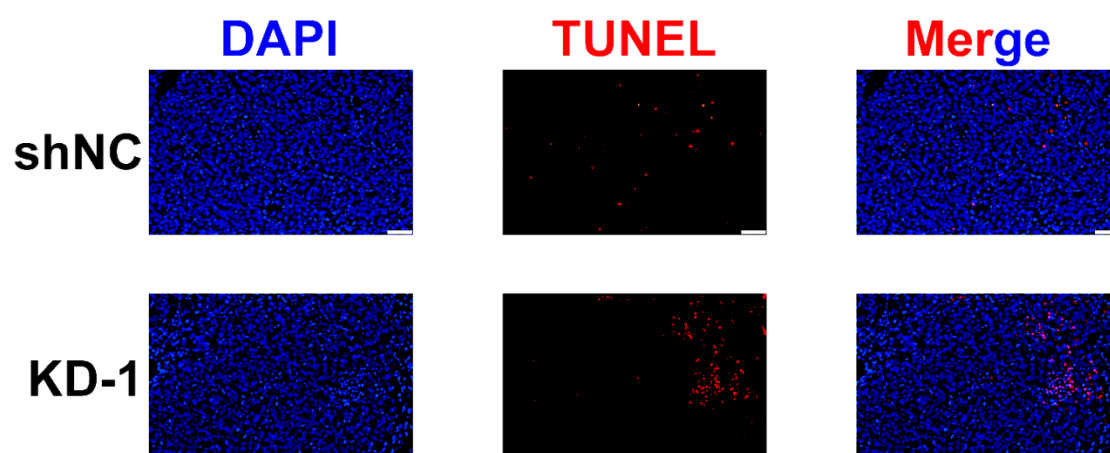

**Supplementary Fig. 7.**

Analysis of TUNEL positive cells in subcutaneous xenografts tumor sections. Scale

bars: 100 $\times$ = 200  $\mu$ m.

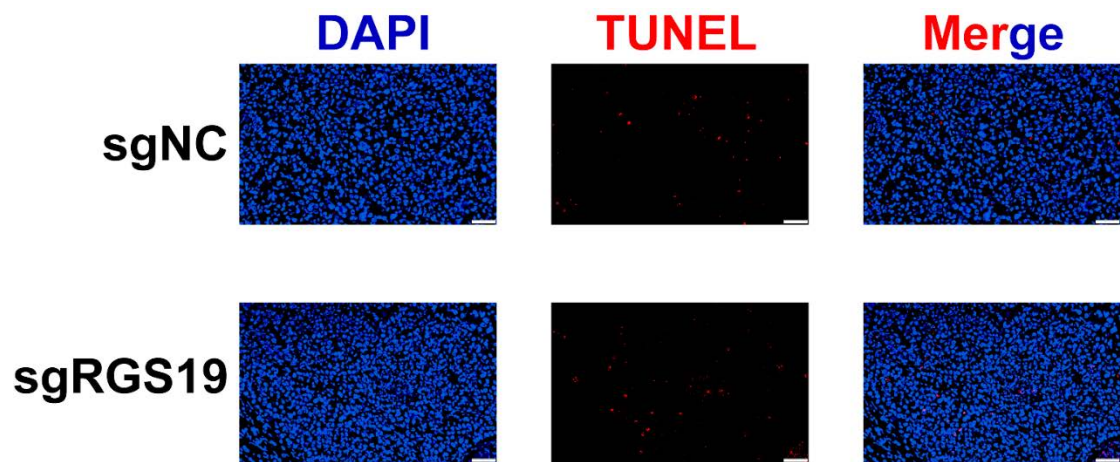

**Supplementary Fig. 8.**

Analysis of TUNEL positive cells in RGS19-knockout and sgNC tumor sections. Scale bars: 100 $\times$ = 200  $\mu$ m.



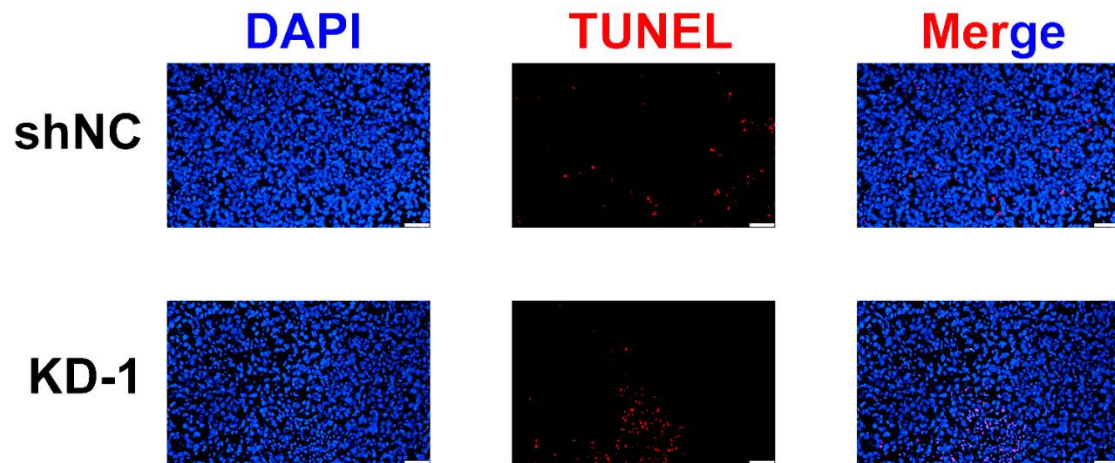

**Supplementary Fig. 9.**

Analysis of TUNEL positive cells in KD-1 and shNC liver orthotopic tumor sections.

Scale bars: 100×= 200 μm.

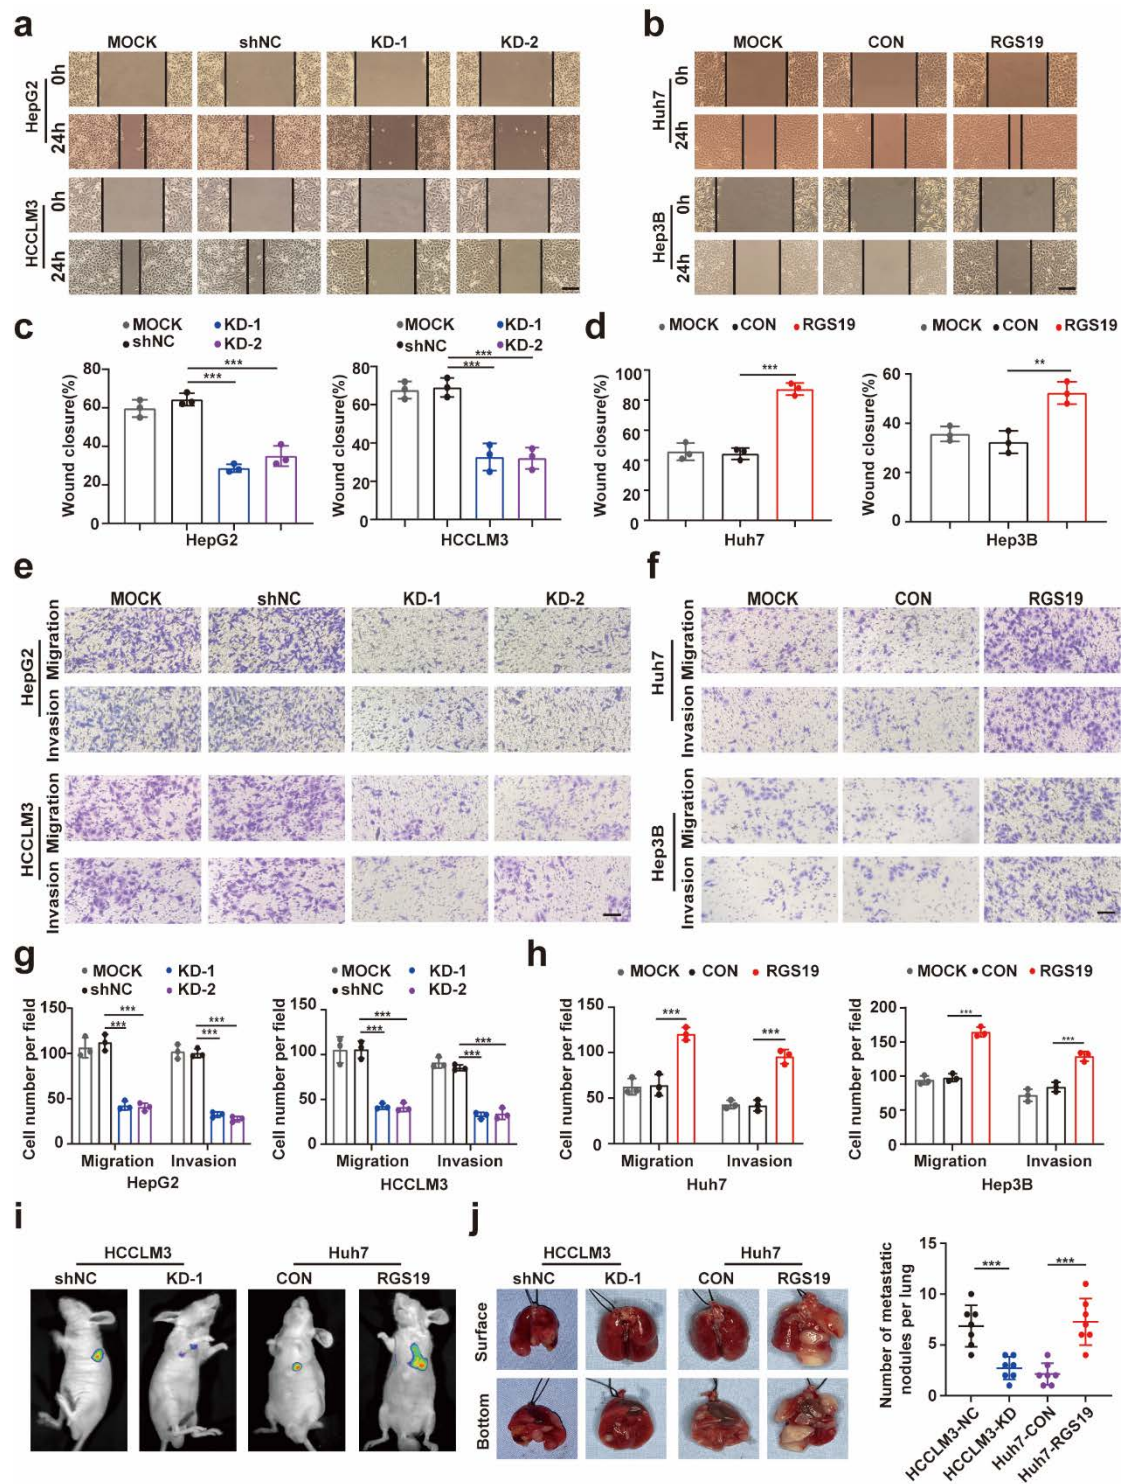

**Supplementary Fig. 10.**

### **RGS19 promotes the migration and invasion of HCC cells in vitro and in vivo**

(a, b) Representative images of the Wound-healing assay with the indicated HCC cells.

Scale bars: 100  $\mu$ m. (c, d) Statistical analysis of Wound-healing assays. (e, f)

Representative images of Transwell migration and invasion assays with the indicated HCC cells. Scale bars: 100  $\mu$ m. (g, h) Statistical analysis of the Transwell assays. (i) Representative images of bioluminescence of lung metastasis model from the indicated HCC cells. (j) Lung metastasis specimens and Statistical analysis of the number of metastatic nodules (n=7/group). All experiments were performed three times, and the data were presented as the means  $\pm$ SD. \* $p$ <0.05; \*\* $p$ <0.01; \*\*\* $p$ <0.001.

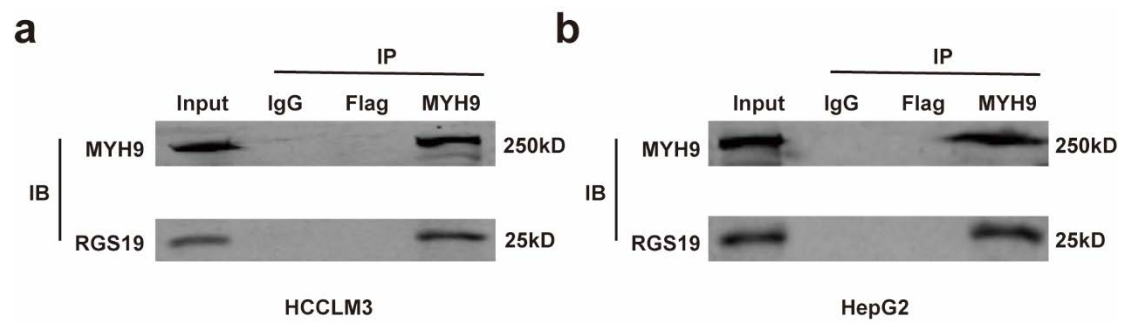

**Supplementary Fig. 11.**

(a, b) The endogenous interaction between MYH9 and RGS19.

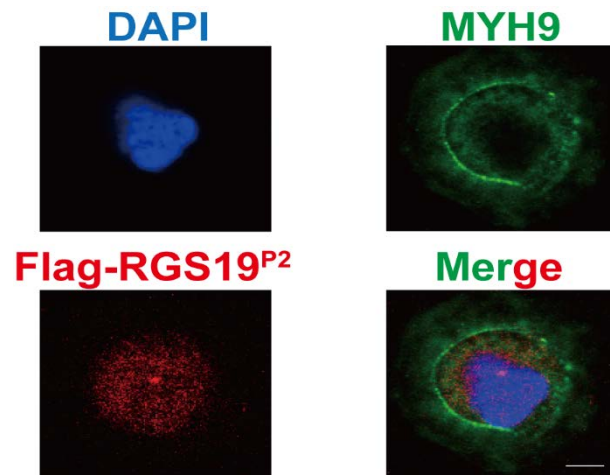

**Supplementary Fig. 12.**

Typical pictures of co-localization assays between MYH9 and Flag-RGS19<sup>P2</sup> in Huh7 cells. Scale bars: 10  $\mu\text{m}$ .

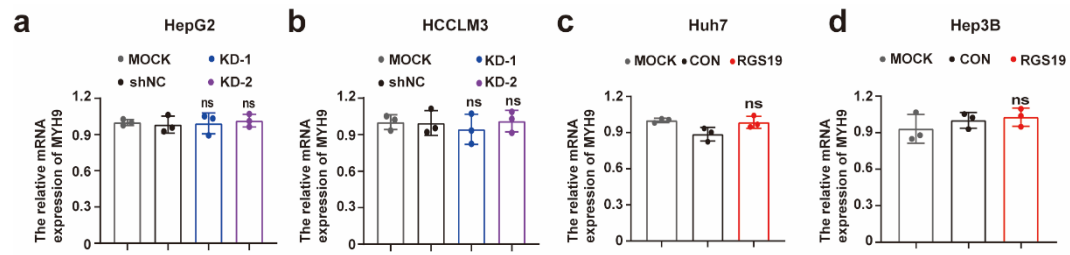

**Supplementary Fig. 13.**

(a-d) MYH9 mRNA levels in RGS19-overexpressing and RGS19-knockdown HCC cells were measured by qRT-PCR.

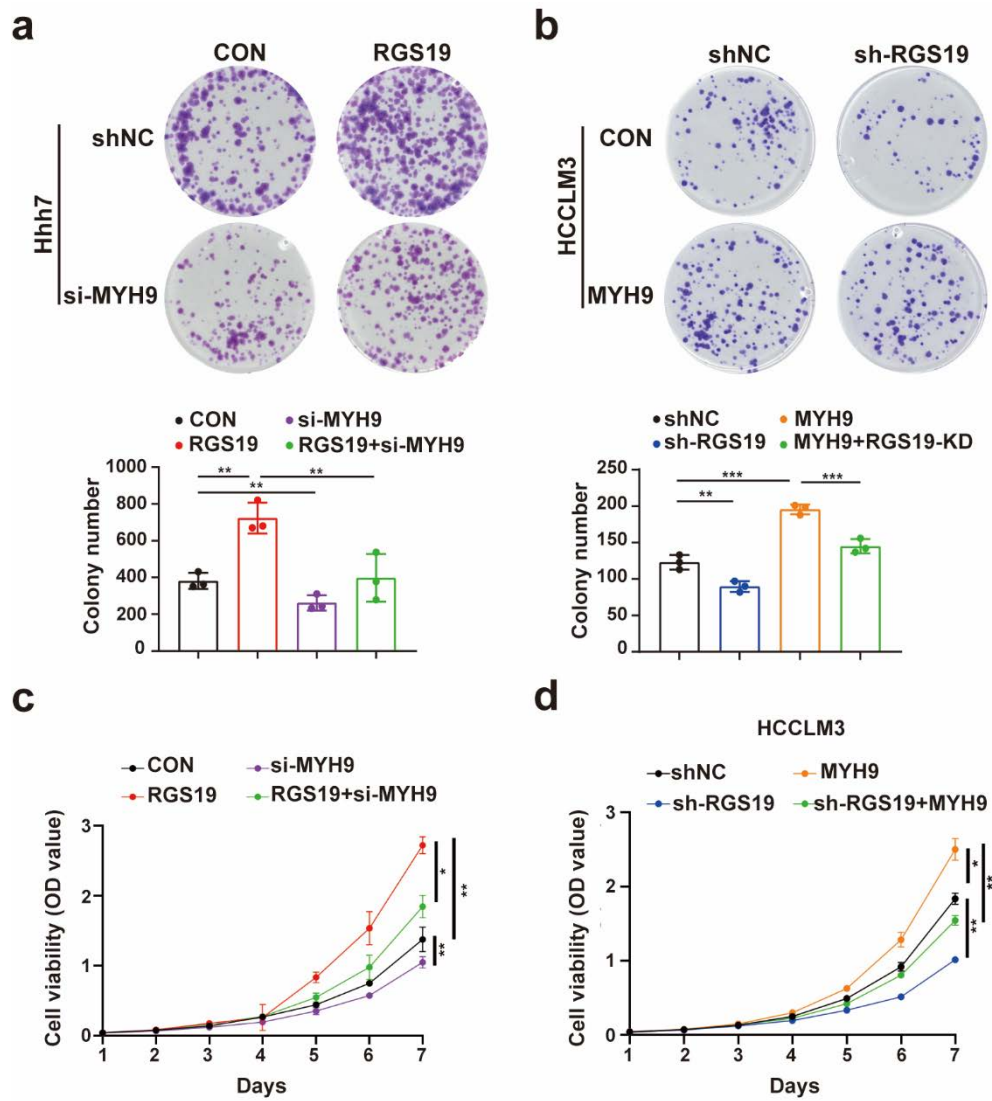

**Supplementary Fig. 14.**

(a, b) Typical images and analysis of colony formation assays after MYH9 silencing or upregulation in Huh7-RGS19 and HCCLM3-shRGS19 cells. (c, d) The CCK-8 assays were performed after MYH9 silencing or upregulation in Huh7-RGS19 and HCCLM3-shRGS19 cells.

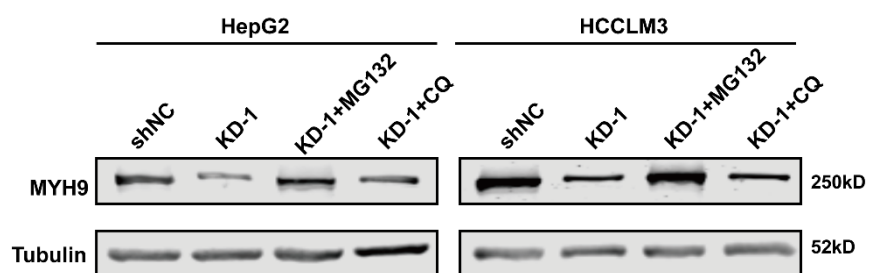

**Supplementary Fig. 15.**

The expression of MYH9 was detected by Western blot



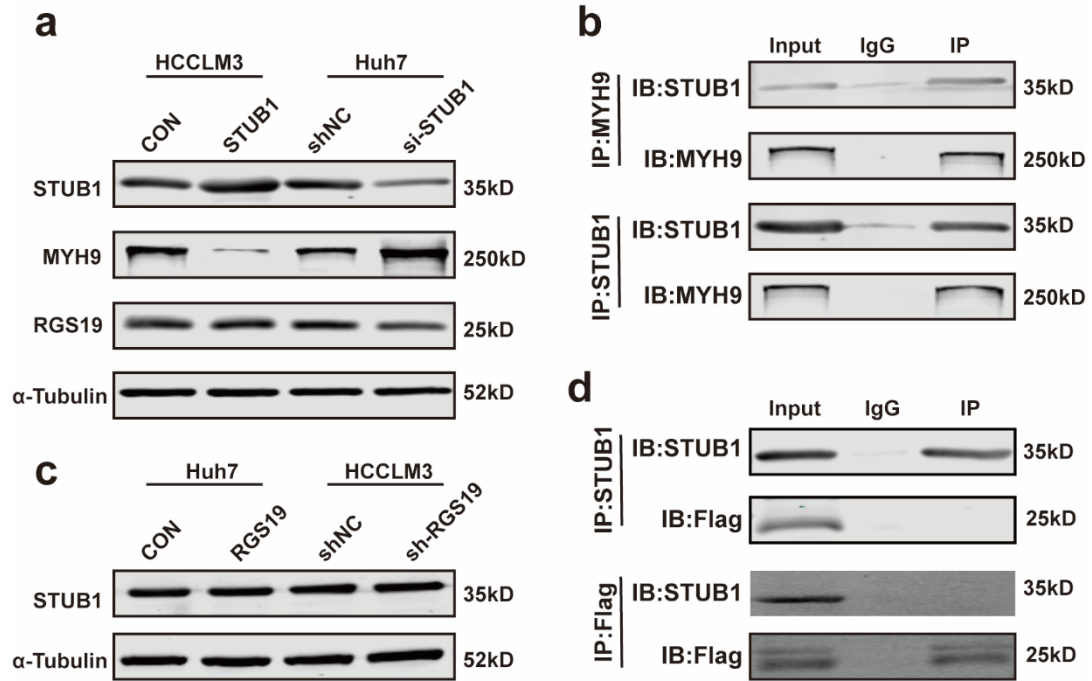

**Supplementary Fig. 16.**

(a) Western blot analysis the expression of MYH9 and RGS19 after STUB1 upregulation and silencing. (b) Co-IP assays analysis of the interaction between MYH9 and STUB1 in HCC cells. (c) Western blot analysis the expression of STUB1 after RGS19 overexpressing and silencing. (d) Co-IP assays analysis of the interaction between RGS19 and STUB1 in HCC cells.

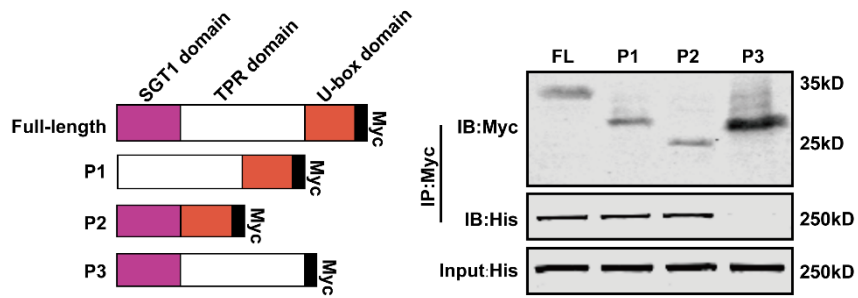

### Supplementary Fig. 17.

Full-length of STUB1<sup>Myc</sup> and its truncated forms (P1, P2 and P3) with MYH9<sup>His</sup> were co-transfected into HEK-293T cells. Cell lysates of 293T cells were immunoprecipitated with anti-Myc (against STUB1). Immunoblot analysis was performed with anti-His (against MYH9).

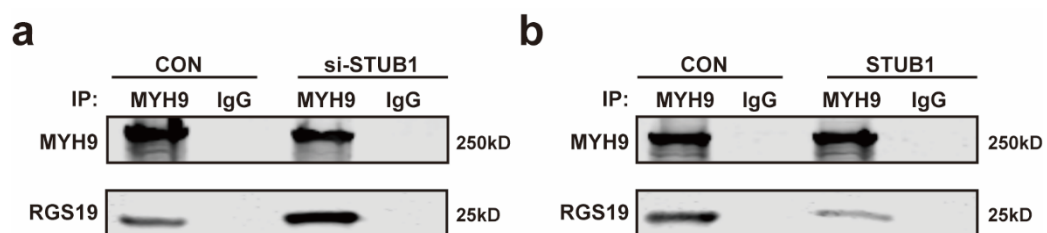

**Supplementary Fig. 18.**

(a) Co-IP assays analysis of the interaction of MYH9 and RGS19 after STUB1 silencing in Huh7 cells. (b) Co-IP assays analysis of the interaction between MYH9 and RGS19 after STUB1 overexpression in HCCLM3 cells.

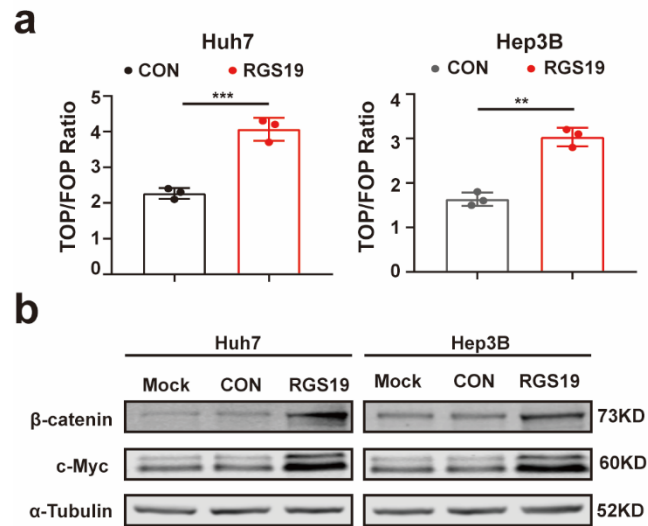

**Supplementary Fig. 19.**

(a) TOP/ FOP luciferase reporter assays were used to detect the transcriptional activity of Wnt signaling pathway in HCC cells with RGS19 overexpression. (b) Western blotting indicated the expression of  $\beta$ -catenin and c-Myc in HCC cells with RGS19 overexpression.

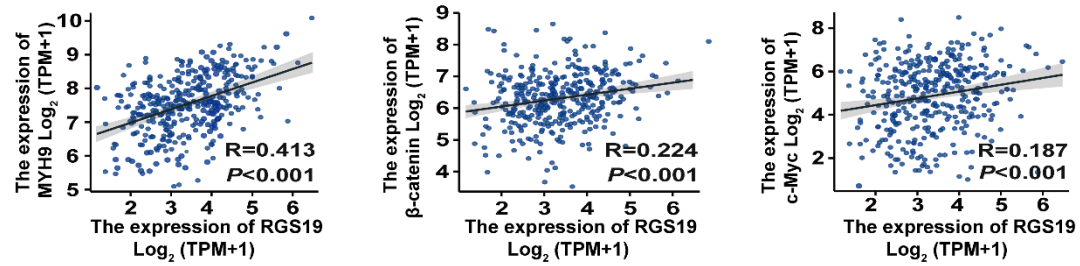

**Supplementary Fig. 20.**

The correlations between RGS19 and MYH9, β-catenin or c-Myc in TCGA database.

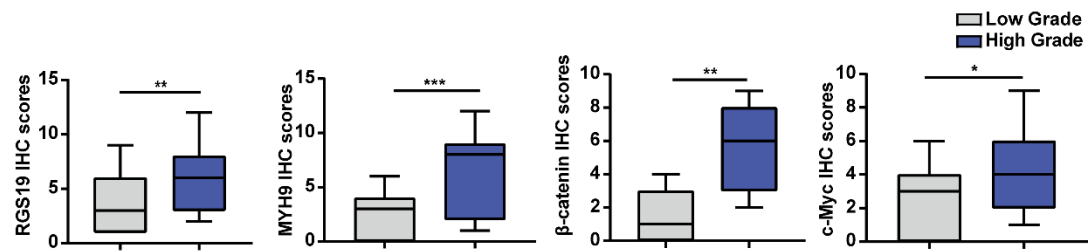

**Supplementary Fig. 21.**

The IHC scores of RGS19, MYH9,  $\beta$ -catenin and c-Myc in low grade and high grade HCC tissues.

# Supplementary Table 1.

Correlation between the clinicopathologic parameters and the expression of RGS19 in HCC.

| Characteristic        | Low expression of RGS19 (n=47) | High expression of RGS19 (n=50) | p     |
|-----------------------|--------------------------------|---------------------------------|-------|
| T stage, n (%)        |                                |                                 | 0.014 |
| T1&T2                 | 26 (26.8%)                     | 15 (15.4%)                      |       |
| T3&T4                 | 21 (21.6%)                     | 35 (36.1%)                      |       |
| Tumor diameter, n (%) |                                |                                 | 0.014 |
| ≤5                    | 32 (33%)                       | 21 (21.6%)                      |       |
| >5                    | 15 (13.4%)                     | 29 (32%)                        |       |
| HBV infection, n (%)  |                                |                                 | 0.409 |
| Yes                   | 30 (30.9%)                     | 27 (27.8%)                      |       |
| No                    | 17 (17.5%)                     | 23 (23.7%)                      |       |
| Gender, n (%)         |                                |                                 | 0.083 |
| Female                | 27 (27.8%)                     | 38 (39.2%)                      |       |
| Male                  | 20 (20.6%)                     | 12 (12.4%)                      |       |
| Age, n (%)            |                                |                                 | 0.31  |
| ≤60                   | 24 (24.7%)                     | 31 (31.9%)                      |       |
| >60                   | 23 (23.7%)                     | 19 (19.6%)                      |       |

| Characteristic           | Low expression of<br>RGS19 (n=47) | High expression of<br>RGS19 (n=50) | p     |
|--------------------------|-----------------------------------|------------------------------------|-------|
| Histologic grade, n (%)  |                                   |                                    | 0.041 |
| G1&G2                    | 31 (32.0%)                        | 22 (22.6%)                         |       |
| G3&G4                    | 16 (16.5%)                        | 28 (28.9%)                         |       |
| AFP(ng/ml), n (%)        |                                   |                                    | 0.003 |
| <=400                    | 36 (37.1%)                        | 23 (23.7%)                         |       |
| >400                     | 11 (11.3%)                        | 27 (27.8%)                         |       |
| Vascular invasion, n (%) |                                   |                                    | 0.419 |
| No                       | 25 (25.8%)                        | 22 (22.7%)                         |       |
| Yes                      | 22 (22.7%)                        | 28 (28.9%)                         |       |



**Supplementary Table 2.**

The primers used in this study

| Gene                | Type | Sequence (5'-3')        |
|---------------------|------|-------------------------|
| RGS19               | FP   | GGCGCAGTCTTTTGACAAGC    |
|                     | RP   | GCCTTCTCGTCTACCACATGC   |
| MYH9                | FP   | AGTTTGTCTCGGAGCTGTGG    |
|                     | RP   | GGTTCGTGTTCCCTCAGCGTA   |
| c-Myc               | FP   | GTCAAGAGGCGAACACACAAC   |
|                     | RP   | TTGGACGGACAGGATGTATGC   |
| Promoter of RGS19-1 | FP   | AGGCATGTGGTCCAAAG       |
|                     | RP   | GAGCTGGGCAGTTGATG       |
| Promoter of RGS19-2 | FP   | GGTGCTGGATGTGCAAAG      |
|                     | RP   | GACCACATGCCTTCCTTC      |
| Promoter of RGS19-2 | FP   | GACGCCTGCCTGTAGAAAG     |
|                     | RP   | GGGATTTGAACCCAGGACC     |
| GAPDH               | FP   | GGAGCGAGATCCCTCCAAAAT   |
|                     | RP   | GGCTGTTGTCATACTTCTCATGG |

### Supplementary Table 3.

#### The primary antibodies used in this study

| Antibody          | Host   | Product number | Company                   | Dilution                                          |
|-------------------|--------|----------------|---------------------------|---------------------------------------------------|
| RGS19             | Rabbit | NBP2-24516     | Novus                     | 1:1000(WB)<br>1:100(IHC)                          |
| MYH9              | Rabbit | 11128-1-AP     | Proteintech               | 1:1000(WB)<br>1:100(IF)<br>1:200(IHC)<br>1:50(IP) |
| FLAG              | Rabbit | 80010-1-RR     | Proteintech               | 1:1000(WB)<br>1:100(IF)<br>1:50(IP)               |
| His               | Mouse  | 66005-1-Ig     | Proteintech               | 1:1000(WB)<br>1:100(IP)                           |
| Myc               | Rabbit | 16286-1-AP     | Proteintech               | 1:1000(WB)<br>1:100(IP)                           |
| HA                | Rabbit | 51064-2-AP     | Proteintech               | 1:1000(WB)                                        |
| Ubiquitin         | Mouse  | Sc-8017        | Santa Cruz                | 1:100(WB)                                         |
| Beta-catenin      | Rabbit | #8480          | Cell Signaling Technology | 1:1000(WB)<br>1:100(IHC)                          |
| C-Myc             | Rabbit | #9402          | Cell Signaling Technology | 1:1000(WB)<br>1:50(ChIP)                          |
| C-Myc             | Rabbit | ab32072        | Abcam                     | 1:50(IHC)                                         |
| Ki-67             | Rabbit | Ab16667        | Abcam                     | 1:200(IHC)                                        |
| GAPDH             | Mouse  | 60004          | Proteintech               | 1:10000(WB)                                       |
| $\alpha$ -Tubulin | Mouse  | 66031          | Proteintech               | 1:10000(WB)                                       |
| STUB1             | Rabbit | ab134064       | Abcam                     | 1:1000(WB)<br>1:100(IP)                           |

# Supplementary Table 4.

The results of LC-MS/MS

| Symbol   | IGG.1 | Test.1 | Test | IGG | fc..Test-<br>-IGG | iBAQ     |
|----------|-------|--------|------|-----|-------------------|----------|
| MYH9     | 0     | 331    | 331  | 0   | 7.567928          | 56156000 |
| TUBA1B   | 0     | 99     | 99   | 0   | 5.844306          | 1.98E+08 |
| TUBB4B   | 0     | 81     | 81   | 0   | 5.560369          | 93534000 |
| EEF1A1   | 0     | 78     | 78   | 0   | 5.507097          | 99350000 |
| ACTB     | 0     | 74     | 74   | 0   | 5.432861          | 1.47E+08 |
| PRKDC    | 0     | 62     | 62   | 0   | 5.184054          | 1712500  |
| MYH10    | 0     | 57     | 57   | 0   | 5.066225          | 3053300  |
| FLNA     | 0     | 57     | 57   | 0   | 5.066225          | 2297800  |
| VIM      | 0     | 52     | 52   | 0   | 4.937909          | 21581000 |
| HSP90AB1 | 0     | 40     | 40   | 0   | 4.573449          | 11900000 |
| RPS3     | 0     | 39     | 39   | 0   | 4.538476          | 34496000 |
| SPTBN1   | 0     | 37     | 37   | 0   | 4.465879          | 1335100  |
| SLC25A6  | 0     | 34     | 34   | 0   | 4.349637          | 62734000 |
| HSPA8    | 0     | 34     | 34   | 0   | 4.349637          | 8529200  |
| RPS8     | 0     | 33     | 33   | 0   | 4.308711          | 35259000 |
| RPL6     | 0     | 32     | 32   | 0   | 4.26659           | 42819000 |
| ATP5A1   | 0     | 31     | 31   | 0   | 4.223202          | 13260000 |
| PKM      | 0     | 30     | 30   | 0   | 4.178469          | 10123000 |
| P67936-2 | 0     | 29     | 29   | 0   | 4.132304          | 34795000 |
| SRSF1    | 0     | 29     | 29   | 0   | 4.132304          | 10188000 |
| SPTAN1   | 0     | 28     | 28   | 0   | 4.084613          | 1179900  |
| RPL8     | 0     | 26     | 26   | 0   | 3.984224          | 53894000 |
| SERPINH1 | 0     | 26     | 26   | 0   | 3.984224          | 11964000 |
| GNB2L1   | 0     | 25     | 25   | 0   | 3.931283          | 4825800  |
| MYL6     | 0     | 24     | 24   | 0   | 3.876324          | 82051000 |
| RPL4     | 0     | 24     | 24   | 0   | 3.876324          | 13346000 |
| KRT8     | 0     | 24     | 24   | 0   | 3.876324          | 11943000 |
| ENO1     | 0     | 23     | 23   | 0   | 3.819188          | 17541000 |
| PLEC     | 0     | 23     | 23   | 0   | 3.819188          | 142280   |
| RPL24    | 0     | 21     | 21   | 0   | 3.697645          | 59896000 |
| RPS3A    | 0     | 21     | 21   | 0   | 3.697645          | 15203000 |
| RPS2     | 0     | 21     | 21   | 0   | 3.697645          | 12651000 |
| DYNC1H1  | 0     | 21     | 21   | 0   | 3.697645          | 331010   |
| RPL26    | 0     | 20     | 20   | 0   | 3.632805          | 70146000 |
| KRT18    | 0     | 20     | 20   | 0   | 3.632805          | 6822400  |
